# Supplementary material for: Outcomes and molecular profile of oligomonocytic CMML support its consideration as the first stage in the CMML continuum
Source: PubMed Central journal article supplement — Blood Adv. 2022 Jul 6;6(13):3921–31. doi: 10.1182/bloodadvances.2022007359 (PMC9278296; doi:10.1182/bloodadvances.2022007359), 2022-07-06
Supplement: advancesADV2022007359-suppl1.pdf [file advancesADV2022007359-suppl1.pdf]

## SUPPLEMENTAL DATA

### Morphological Studies

At least, two bone marrow and one peripheral blood May–Grünwald–Giemsa-stained smears were used for conducting the morphologic analysis. In addition, a Prussian blue-stained bone marrow smear was used for assessing the percentage of ring sideroblasts, and a non-specific esterase, usually the  $\alpha$ -naphthyl butyrate esterase, was used to better identify the monocyte lineage. The WHO 2017 proposals for evaluating the morphological diagnosis of myelodysplastic syndrome and chronic myelomonocytic leukemia were followed strictly. As recommended, peripheral blood and bone marrow differential counts were performed on at least 200 and 500 cells, respectively. Following the 2017 WHO recommendations, the threshold used for considering a myeloid cell line as dysplastic was the presence of  $\geq 10\%$  abnormal cells in the corresponding myeloid lineage. For the evaluation of dysplasia, at least 200 neutrophils, 200 erythroblasts, and 30 megakaryocytes were assessed in bone marrow. Multilineage dysplasia was defined by dysplasia involving two or more lineages. Morphological evaluation of monocytes and their precursors was made following the current consensus document<sup>1</sup>. As currently recommended by the Spanish Guidelines for the diagnosis and treatment of myelodysplastic syndromes and chronic myelomonocytic leukemia, bone marrow biopsy was conducted in those cases where fibrosis, hypoplastic bone marrow, or idiopathic cytopenias of undetermined significance were suspected. In addition, we performed a bone marrow biopsy with a detailed histologic examination in all those cases in which it was necessary to exclude certain differential diagnoses with clinical and biological characteristics close to CMML or OM-CMML (e.g.: essential thrombocythemia with monocytosis, prefibrotic primary myelofibrosis with monocytosis, primary myelofibrosis with monocytosis, systemic mastocytosis with an associated CMML).

1. Goasguen JE, Bennett JM, Bain BJ, et al. Morphological evaluation of monocytes and their precursors. *Haematologica*. 2009;94(7):994-997.

### Next-Generation Sequencing

The DNA obtained from total PB or BM was quantified by Qubit fluorometer (Thermo Fisher Scientific, Carlsbad, USA). 40 ng of DNA were required for library preparation. Targeted amplicon libraries (QIAseq Custom DNA Panels, Qiagen, Hilden, Germany) were prepared using a custom panel covering the full exonic regions of 25 genes associated with myeloid malignancies (*ASXL1*, *CALR*, *CBL*, *CSF3R*, *DNMT3A*, *ETV6*, *EZH2*, *IDH1*, *IDH2*, *JAK2*, *KIT*, *KRAS*, *MPL*, *NRAS*, *PRPF8*, *RUNX1*, *SETBP1*, *SF3B1*, *SH2B3*, *SRSF2*, *STAG2*, *TET2*, *TP53*, *U2AF1*, *ZRSR2*). Library preparation incorporated molecular barcoding technology to tag individual DNA molecules, which enables variant detection with high confidence by avoiding false positives, PCR artifacts and library bias. Libraries were sequenced with 2x150-bp paired-end reads using either MiSeq or NextSeq (Illumina, San Diego, CA, USA) with a 2000x minimum coverage.

Sequencing files were processed using the GeneGlobe Data Analysis Center (Qiagen) for FASTQ trimming, alignment to the reference genome and generation of variant calling files (.vcf) (smCounter2, Qiagen). The obtained variants were then annotated and classified using Illumina VariantStudio 3.0 software according to genomic databases (GenomAD, Varsome, cBioPortal, dbSNP, COSMIC, My Cancer Genome, Cancer Genome Interpreter) and evidence of

pathogenicity in the literature. Variants were classified into five groups: benign, likely benign, unknown significance, likely pathogenic and pathogenic<sup>1,2</sup>. Only variants classified as pathogenic or likely pathogenic were included in this study. The limit of detection established for variant detection was 2% variant allele frequency (VAF). In cases with low VAF, variants were confirmed visually using the Integrative Genomics Viewer (IGV) v2.4 software.

1. Palomo L, Ibáñez M, Abáigar M, et al. Spanish Guidelines for the use of targeted deep sequencing in myelodysplastic syndromes and chronic myelomonocytic leukaemia. *Br. J. Haematol.* 2020;188(5):605–622.
2. Li MM, Datto M, Duncavage EJ, et al. Standards and Guidelines for the Interpretation and Reporting of Sequence Variants in Cancer: A Joint Consensus Recommendation of the Association for Molecular Pathology, American Society of Clinical Oncology, and College of American Pathologists. *J Mol Diagn.* 2017;19(1):4-23.

## Flow cytometry analysis of monocyte subsets in peripheral blood

Multiparametric flow cytometry analysis of monocyte subsets was performed on whole peripheral blood collected on EDTA. Based on Euroflow Consortium recommendations we follow the stain-lyse-wash procedure with FACS Lysing Solution (BD Biosciences, CA, USA). Cell surface staining of  $2 \times 10^6$  cells was performed and at least 500,000 total events were acquired per tube (FACS Canto II, BD Biosciences). A 4-color experimental panel with five tubes was run for all samples. Tube 1: CD14 (FITC; clone MΦP9), CD16 (PE; clone B73.1), CD45 (PerCP-Cy5.5; clone 2D1), CD33 (APC; clone P67.6); tube 2: CD64 (FITC; clone 10.1), CD56 (PE; clone NCAM16.2), HLA-DR (PerCP-Cy5.5; clone G46-6), CD33 (APC; clone P67.6); tube 3: CD2 (FITC; clone S5.2), CD7 (PE; clone M-T701), CD45 (PerCP-Cy5.5; clone 2D1), CD33 (APC; clone P67.6); tube 4: CD56 (FITC; clone NCAM16.2), CD123 (PE; clone 9F5), HLA-DR (PerCP-Cy5.5; clone G46-6), CD45 (APC; clone 2D1); tube 5: CD2 (FITC; clone S5.2), CD14 (PE; clone MΦP9), HLA-DR (PerCP-Cy5.5; clone G46-6), CD33 (APC; clone P67.6) (all antibodies from BD Biosciences, San Jose, CA). Analysis was performed with Infinicyt version 1.7 software (Cytognos SL).

Briefly, we excluded doublets (FSC-A/FSC-H dot plot), *debris* (FSC/SSC and CD45/SSC dot plots) and NK-cells (CD16+, CD33-, and FSC/SSC lymphocyte-gate). A proper strategy for excluding NK-cells is crucial, since some of these may be difficult to differentiate from the nonclassical monocyte subset (CD14- or dim/CD16+) (Supplemental Figure 1a). For this purpose, we selected the CD16-B73.1 antibody since this binds to CD16-positive neutrophils with lower intensity when compared with some other CD16-specific antibodies (e.g.: 3G8, VEP13, NKP15, GO22)<sup>1</sup>. By using this, the CD16 positive populations of monocytes and NK-cells are better distinguished from neutrophils. The monocyte gate was determined based on a CD45 vs SSC plot and CD33 vs SSC plot. Since nonclassical monocytes show dimmer CD33 and brighter CD45 expression than the rest of monocytes, it is important to draw a wide gate on CD33 vs SSC plot to avoid the loss of this population (Supplemental Figure 1b). Next, as in Selimoglu-Buet et al, CD14- or dim/CD16- cells were excluded (mainly myeloid dendritic cells are removed in this step) and finally, the resulting monocyte population was assessed for CD14 and CD16 expression. By this method, we were able to establish the percentage of classical monocytes (MO1: CD14+/CD16-), intermediate monocytes (MO2: CD14+/CD16+), and nonclassical monocytes (MO3: CD14- or dim/CD16+) from the total monocyte population (Supplemental Figure 1c). In addition, we assessed the expression of CD56 (Supplemental Figure 1c), CD7 and CD2 in monocytes (cutoff positivity  $\geq 20\%$ ). The fifth tube of our protocol was especially designed to quantify myeloid dendritic cells (CD33+ bright, HLA-DR+ bright, CD14-, CD2+). To properly assess CD2 expression in monocytes, myeloid dendritic cells must be removed, since these are CD33+ bright, like monocytes, and express CD2 (Supplemental Figure 1d). The fourth tube was designed to quantify plasmacytoid dendritic cells and to evaluate CD56 expression on these (Supplemental Figure 1e).

1. Perussia B, Trinchieri G, Jackson A, et al. The Fc receptor for IgG on human natural killer cells: phenotypic, functional, and comparative studies with monoclonal antibodies. *J Immunol.* 1984 Jul;133(1):180-9.

Gating strategy used to identify monocyte subsets in peripheral blood and to assess CD56 and CD2 expression in monocytes (a-d). Gating strategy used to identify myeloid dendritic cells (mDCs) in peripheral blood (d). Gating strategy used to identify plasmacytoid dendritic cells (pDCs) in peripheral blood (e).

**Figure 1a**

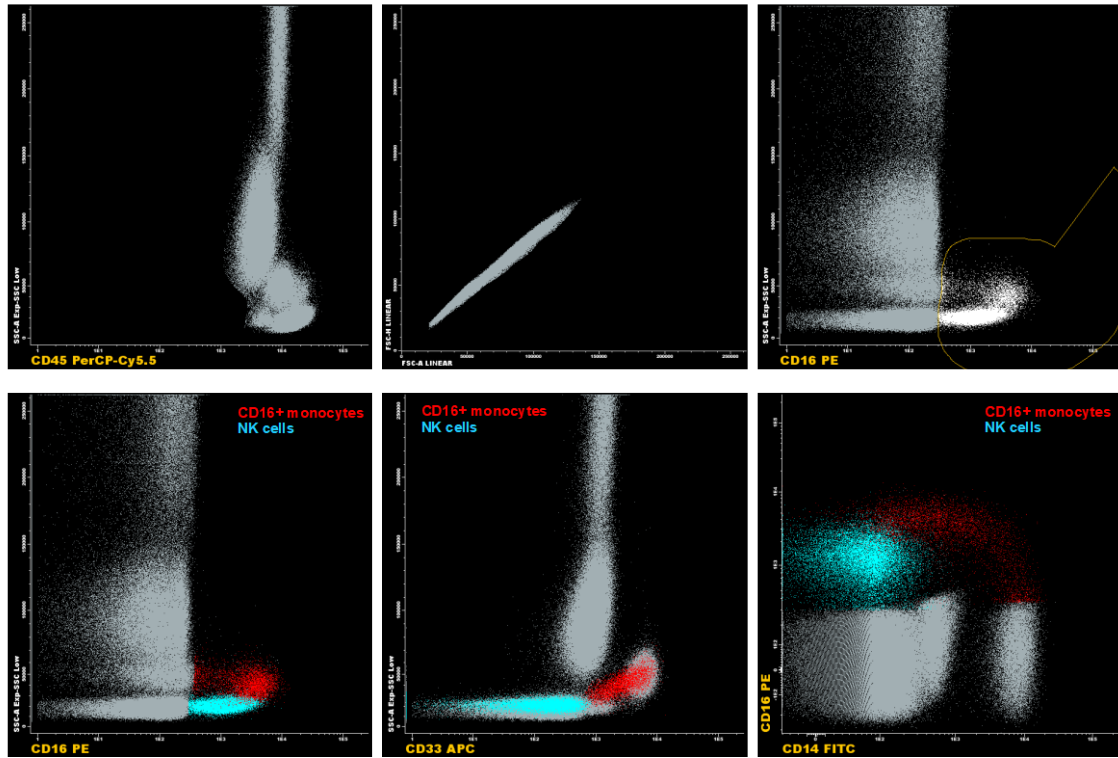

**Figure 1b**

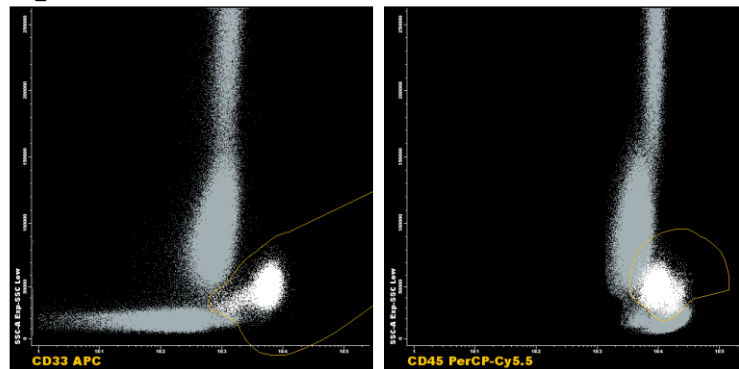

**Figure 1c**

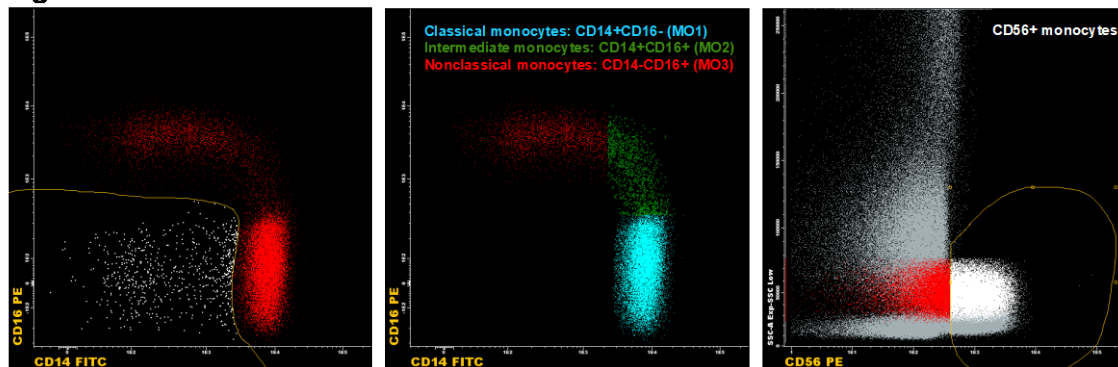

**Figure 1d**

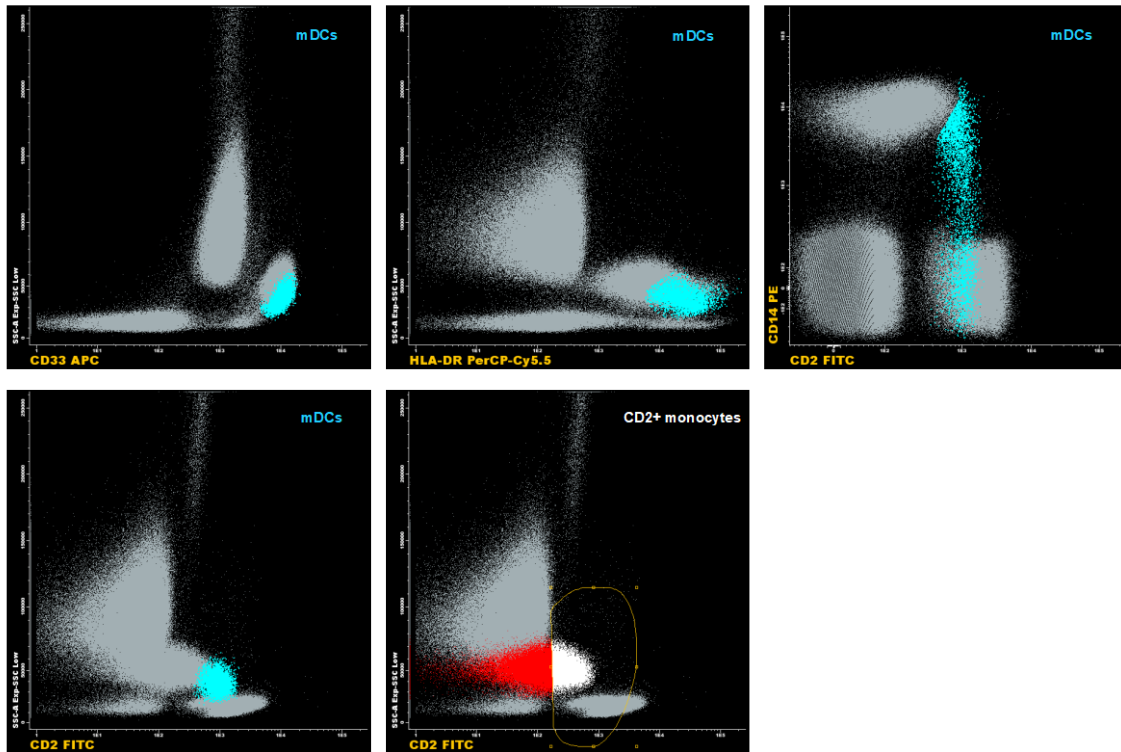

**Figure 1e**

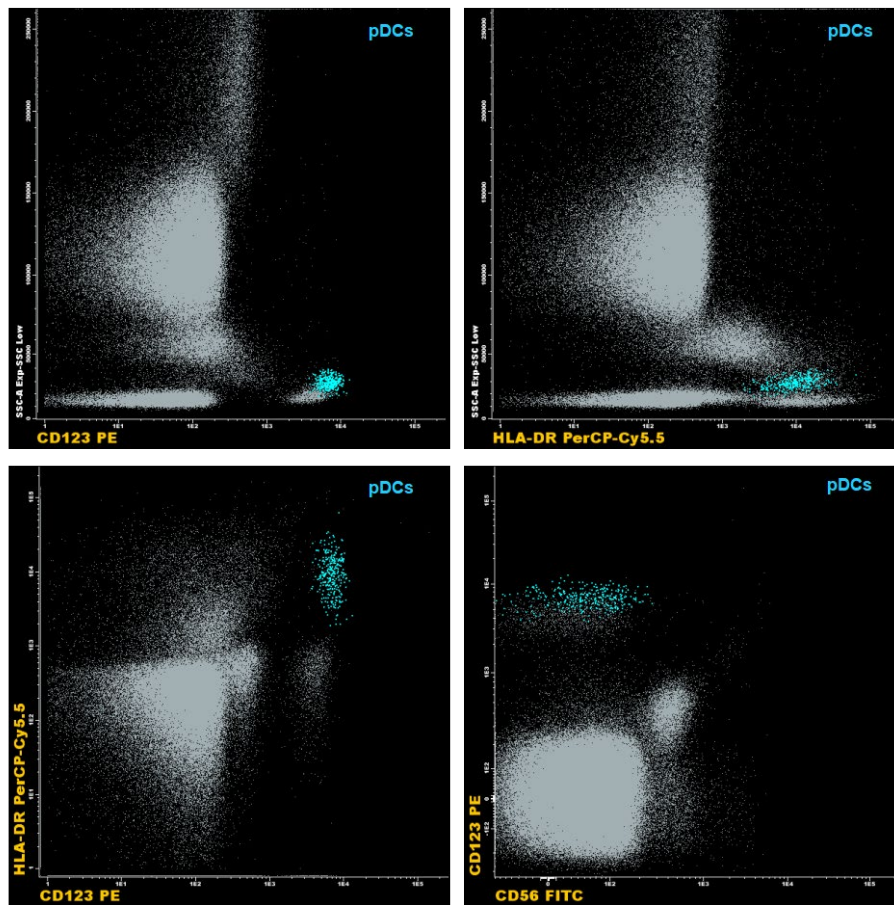

**Supplemental Figure 1.** An example of the four patterns of evolution of OM-CMML into overt CMML.

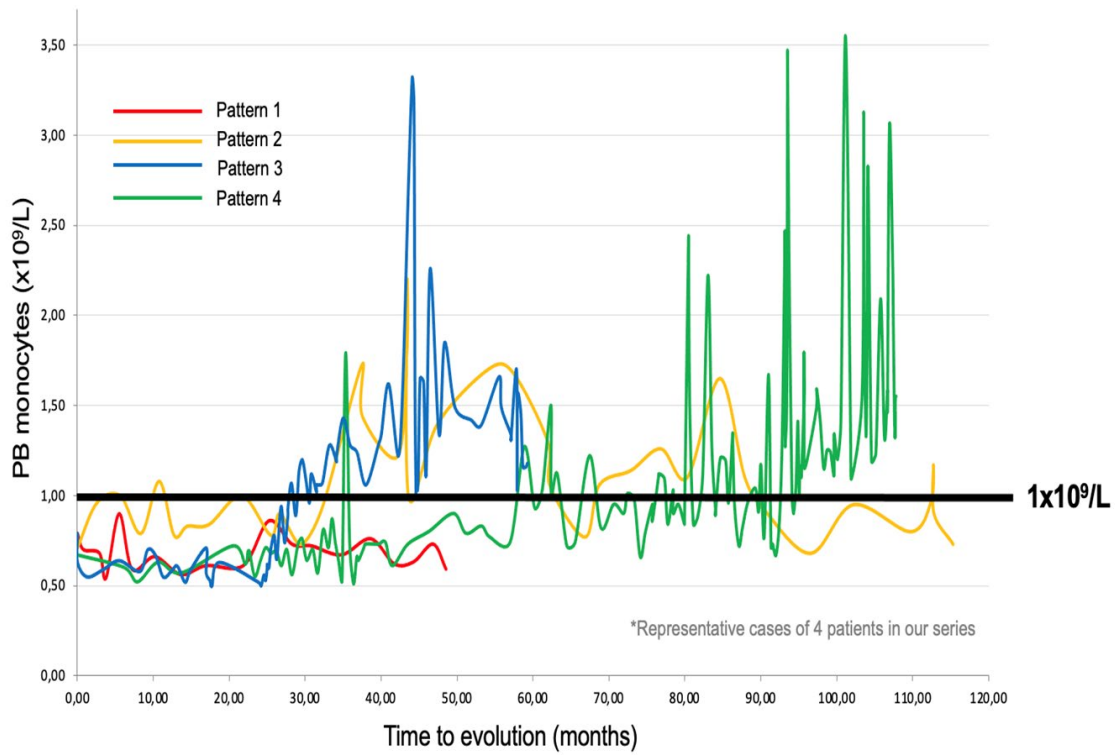

Complete list of variants identified.

| PACIENT ID | PHENOTYPE | GENE   | MUTATION                                       | PROTEIN CONSEQUENCE               | VAF % | TYPE      | CONSEQUENCE             |
|------------|-----------|--------|------------------------------------------------|-----------------------------------|-------|-----------|-------------------------|
| 1          | OM-CMML   | SF3B1  | NM_012433.2:c.1986C>G                          | NP_036565.2:p.His662Gln           | 45,23 | snv       | missense_variant        |
| 1          | OM-CMML   | DNMT3A | NM_175629.2:c.1015-2A>G                        |                                   | 42,23 | snv       | splice_acceptor_variant |
| 2          | OM-CMML   | ZRSR2  | NM_005089.3:c.320T>G                           | NP_005080.1:p.Leu107Ter           | 54,47 | snv       | stop_gained             |
| 2          | OM-CMML   | TET2   | NM_001127208.2:c.4781delC                      | NP_001120680.1:p.Pro1594LeufsTer2 | 37,67 | deletion  | frameshift_variant      |
| 2          | OM-CMML   | TET2   | NM_001127208.2:c.1835delC                      | NP_001120680.1:p.Pro612LeufsTer27 | 37,41 | deletion  | frameshift_variant      |
| 3          | OM-CMML   | ZRSR2  | NM_005089.3:c.827+1G>A                         |                                   | 89,28 | snv       | splice_donor_variant    |
| 3          | OM-CMML   | TET2   | NM_001127208.2:c.4393C>T                       | NP_001120680.1:p.Arg1465Ter       | 45,45 | snv       | stop_gained             |
| 3          | OM-CMML   | ASXL1  | NM_015338.5:c.2740G>T                          | NP_056153.2:p.Glu914Ter           | 44,65 | snv       | stop_gained             |
| 3          | OM-CMML   | TET2   | NM_001127208.2:c.1433_1449delAAAGGCCTCAGAATAAT | NP_001120680.1:p.Glu478ValfsTer6  | 38,42 | deletion  | frameshift_variant      |
| 4          | OM-CMML   | TET2   | NM_001127208.2:c.4126G>T                       | NP_001120680.1:p.Asp1376Tyr       | 41,43 | snv       | missense_variant        |
| 4          | OM-CMML   | TET2   | NM_001127208.2:c.1648C>T                       | NP_001120680.1:p.Arg550Ter        | 40,81 | snv       | stop_gained             |
| 5          | OM-CMML   | STAG2  | NM_001042749.1:c.2542C>T                       | NP_001036214.1:p.Gln848Ter        | 95,71 | snv       | stop_gained             |
| 5          | OM-CMML   | ZRSR2  | NM_005089.3:c.789delA                          | NP_005080.1:p.Glu263AspfsTer4     | 91,72 | deletion  | frameshift_variant      |
| 5          | OM-CMML   | EZH2   | NM_004456.4:c.479delA                          | NP_004447.2:p.Asp160ValfsTer7     | 87,92 | deletion  | frameshift_variant      |
| 5          | OM-CMML   | ASXL1  | NM_015338.5:c.1934dupG                         | NP_056153.2:p.Gly646TrpfsTer12    | 26,53 | insertion | frameshift_variant      |
| 5          | OM-CMML   | NRAS   | NM_002524.4:c.35G>C                            | NP_002515.1:p.Gly12Ala            | 22,79 | snv       | missense_variant        |
| 5          | OM-CMML   | TET2   | NM_001127208.2:c.1246_1247insGAACC             | NP_001120680.1:p.Pro416ArgfsTer13 | 20,48 | insertion | frameshift_variant      |
| 5          | OM-CMML   | NRAS   | NM_002524.4:c.38G>A                            | NP_002515.1:p.Gly13Asp            | 9,93  | snv       | missense_variant        |
| 5          | OM-CMML   | RUNX1  | NM_001754.4:c.292delC                          | NP_001745.2:p.Leu98SerfsTer24     | 6,86  | deletion  | frameshift_variant      |
| 5          | OM-CMML   | KRAS   | NM_033360.2:c.182A>G                           | NP_203524.1:p.Gln61Arg            | 3,4   | snv       | missense_variant        |
| 6          | OM-CMML   | STAG2  | NM_001042749.1:c.2265+1G>A                     |                                   | 17,89 | snv       | splice_donor_variant    |
| 7          | OM-CMML   | SF3B1  | NM_012433.2:c.2098A>G                          | NP_036565.2:p.Lys700Glu           | 49,02 | snv       | missense_variant        |
| 7          | OM-CMML   | EZH2   | NM_004456.4:c.2233G>A                          | NP_004447.2:p.Glu745Lys           | 48,5  | snv       | missense_variant        |
| 7          | OM-CMML   | TET2   | NM_001127208.2:c.2461C>T                       | NP_001120680.1:p.Gln821Ter        | 46,6  | snv       | stop_gained             |

|    |         |        |                                    |                                    |       |           |                                   |
|----|---------|--------|------------------------------------|------------------------------------|-------|-----------|-----------------------------------|
| 7  | OM-CMML | TET2   | NM_001127208.2:c.4115C>T           | NP_001120680.1:p.Thr1372Ile        | 46    | snv       | missense_variant                  |
| 7  | OM-CMML | TP53   | NM_000546.5:c.1024C>T              | NP_000537.3:p.Arg342Ter            | 27,86 | snv       | stop_gained                       |
| 8  | OM-CMML | TET2   | NM_001127208.2:c.4100C>T           | NP_001120680.1:p.Pro1367Leu        | 94,56 | snv       | missense_variant                  |
| 8  | OM-CMML | SRSF2  | NM_003016.4:c.284C>T               | NP_003007.2:p.Pro95Leu             | 47,39 | snv       | missense_variant                  |
| 9  | OM-CMML | TET2   | NM_001127208.2:c.3575G>T           | NP_001120680.1:p.Gly1192Val        | 95,43 | snv       | missense_variant                  |
| 9  | OM-CMML | RUNX1  | NM_001754.4:c.127_128insGCGGC      | NP_001745.2:p.Pro43ArgfsTer7       | 37,07 | insertion | frameshift_variant                |
| 9  | OM-CMML | CBL    | NM_005188.3:c.1211G>A              | NP_005179.2:p.Cys404Tyr            | 2,83  | snv       | missense_variant                  |
| 11 | OM-CMML | U2AF1  | NM_006758.2:c.470A>C               | NP_006749.1:p.Gln157Pro            | 47,67 | snv       | missense_variant                  |
| 11 | OM-CMML | ETV6   | NM_001987.4:c.33+1G>C              |                                    | 43,93 | snv       | splice_donor_variant              |
| 11 | OM-CMML | ASXL1  | NM_015338.5:c.2122C>T              | NP_056153.2:p.Gln708Ter            | 42,01 | snv       | stop_gained                       |
| 11 | OM-CMML | ASXL1  | NM_015338.5:c.2535dupC             | NP_056153.2:p.Ser846GlnfsTer5      | 41,42 | insertion | frameshift_variant                |
| 12 | OM-CMML | ZRSR2  | NM_005089.3:c.812A>G               | NP_005080.1:p.Tyr271Cys            | 67,65 | snv       | missense_variant                  |
| 13 | OM-CMML | TET2   | NM_001127208.2:c.3412C>T           | NP_001120680.1:p.Gln1138Ter        | 33,33 | snv       | stop_gained,splice_region_variant |
| 13 | OM-CMML | JAK2   | NM_004972.3:c.1849G>T              | NP_004963.1:p.Val617Phe            | 15,28 | snv       | missense_variant                  |
| 13 | OM-CMML | TET2   | NM_001127208.2:c.4753_4754delAC    | NP_001120680.1:p.Thr1585PhefsTer28 | 14,77 | deletion  | frameshift_variant                |
| 13 | OM-CMML | IDH2   | NM_002168.2:c.419G>A               | NP_002159.2:p.Arg140Gln            | 12,21 | snv       | missense_variant                  |
| 14 | OM-CMML | TET2   | NM_001127208.2:c.3893G>A           | NP_001120680.1:p.Cys1298Tyr        | 16,57 | snv       | missense_variant                  |
| 14 | OM-CMML | SF3B1  | NM_012433.2:c.1873C>T              | NP_036565.2:p.Arg625Cys            | 16,36 | snv       | missense_variant                  |
| 15 | OM-CMML | TET2   | NM_001127208.2:c.3410-2A>G         |                                    | 42,09 | snv       | splice_acceptor_variant           |
| 15 | OM-CMML | TET2   | NM_001127208.2:c.3812dupG          | NP_001120680.1:p.Cys1271TrpfsTer29 | 40,81 | insertion | frameshift_variant                |
| 16 | OM-CMML | RUNX1  | NM_001754.4:c.676_677delAG         | NP_001745.2:p.Ser226Ter            | 29,73 | deletion  | frameshift_variant                |
| 16 | OM-CMML | TET2   | NM_001127208.2:c.2656_2660dupCAGGA | NP_001120680.1:p.Glu887AspfsTer36  | 18,97 | insertion | frameshift_variant                |
| 17 | OM-CMML | TET2   | NM_001127208.2:c.4615dupC          | NP_001120680.1:p.Gln1539ProfsTer39 | 36,12 | insertion | frameshift_variant                |
| 17 | OM-CMML | SRSF2  | NM_003016.4:c.283C>A               | NP_003007.2:p.Pro95Thr             | 2,14  | snv       | missense_variant                  |
| 18 | OM-CMML | SF3B1  | NM_012433.2:c.2342A>G              | NP_036565.2:p.Asp781Gly            | 41,26 | snv       | missense_variant                  |
| 18 | OM-CMML | TET2   | NM_001127208.2:c.3866G>A           | NP_001120680.1:p.Cys1289Tyr        | 40,9  | snv       | missense_variant                  |
| 18 | OM-CMML | DNMT3A | NM_175629.2:c.939_945dupGTGGATG    | NP_783328.1:p.Thr316ValfsTer10     | 34,15 | insertion | frameshift_variant                |



|    |         |        |                                          |                                    |       |           |                                   |
|----|---------|--------|------------------------------------------|------------------------------------|-------|-----------|-----------------------------------|
| 19 | OM-CMML | SH2B3  | NM_005475.2:c.685_691delGGCCCCG          | NP_005466.1:p.Gly229MetfsTer47     | 30,72 | deletion  | frameshift_variant                |
| 19 | OM-CMML | SRSF2  | NM_003016.4:c.284C>T                     | NP_003007.2:p.Pro95Leu             | 24,38 | snv       | missense_variant                  |
| 19 | OM-CMML | TET2   | NM_001127208.2:c.4042C>T                 | NP_001120680.1:p.Gln1348Ter        | 23,99 | snv       | stop_gained,splice_region_variant |
| 19 | OM-CMML | TET2   | NM_001127208.2:c.848_861delAGTGCCTCCAAAG | NP_001120680.1:p.Glu283AlafsTer7   | 19,68 | deletion  | frameshift_variant                |
| 19 | OM-CMML | DNMT3A | NM_175629.2:c.709C>T                     | NP_783328.1:p.Gln237Ter            | 6,65  | snv       | stop_gained                       |
| 20 | OM-CMML | DNMT3A | NM_175629.2:c.1924G>T                    | NP_783328.1:p.Gly642Ter            | 48,2  | snv       | stop_gained                       |
| 20 | OM-CMML | SF3B1  | NM_012433.2:c.1876A>G                    | NP_036565.2:p.Asn626Asp            | 47,83 | snv       | missense_variant                  |
| 20 | OM-CMML | SETBP1 | NM_015559.2:c.2602G>A                    | NP_056374.2:p.Asp868Asn            | 4,69  | snv       | missense_variant                  |
| 21 | OM-CMML | IDH1   | NM_005896.2:c.394C>T                     | NP_005887.2:p.Arg132Cys            | 27,5  | snv       | missense_variant                  |
| 21 | OM-CMML | ASXL1  | NM_015338.5:c.1900_1922del23             | NP_056153.2:p.Glu635ArgfsTer15     | 12,01 | deletion  | frameshift_variant                |
| 22 | OM-CMML | ZRSR2  | NM_005089.3:c.868C>T                     | NP_005080.1:p.Arg290Ter            | 52,92 | snv       | stop_gained                       |
| 22 | OM-CMML | TET2   | NM_001127208.2:c.4150G>C                 | NP_001120680.1:p.Asp1384His        | 32,32 | snv       | missense_variant                  |
| 22 | OM-CMML | ZRSR2  | NM_005089.3:c.376C>T                     | NP_005080.1:p.Arg126Ter            | 4,58  | snv       | stop_gained                       |
| 23 | OM-CMML | DNMT3A | NM_175629.2:c.2201T>C                    | NP_783328.1:p.Phe734Ser            | 38,7  | snv       | missense_variant                  |
| 24 | OM-CMML | SRSF2  | NM_003016.4:c.284C>T                     | NP_003007.2:p.Pro95Leu             | 37,57 | snv       | missense_variant                  |
| 24 | OM-CMML | TET2   | NM_001127208.2:c.1771C>T                 | NP_001120680.1:p.Gln591Ter         | 35,1  | snv       | stop_gained                       |
| 24 | OM-CMML | RUNX1  | NM_001754.4:c.1097delT                   | NP_001745.2:p.Ile366ThrfsTer228    | 34,45 | deletion  | frameshift_variant                |
| 24 | OM-CMML | ASXL1  | NM_015338.5:c.1926dupA                   | NP_056153.2:p.Gly643ArgfsTer15     | 32,74 | insertion | frameshift_variant                |
| 25 | OM-CMML | SF3B1  | NM_012433.2:c.1866G>T                    | NP_036565.2:p.Glu622Asp            | 27,27 | snv       | missense_variant                  |
| 25 | OM-CMML | TET2   | NM_001127208.2:c.369dupT                 | NP_001120680.1:p.Asn124Ter         | 22,28 | insertion | frameshift_variant                |
| 25 | OM-CMML | IDH2   | NM_002168.2:c.419G>A                     | NP_002159.2:p.Arg140Gln            | 10,19 | snv       | missense_variant                  |
| 25 | OM-CMML | SRSF2  | NM_003016.4:c.284C>A                     | NP_003007.2:p.Pro95His             | 9,02  | snv       | missense_variant                  |
| 26 | OM-CMML | TET2   | NM_001127208.2:c.2257A>T                 | NP_001120680.1:p.Lys753Ter         | 56,72 | snv       | stop_gained                       |
| 26 | OM-CMML | TET2   | NM_001127208.2:c.3899T>G                 | NP_001120680.1:p.Phe1300Cys        | 21,18 | snv       | missense_variant                  |
| 26 | OM-CMML | SF3B1  | NM_012433.2:c.2098A>G                    | NP_036565.2:p.Lys700Glu            | 5,43  | snv       | missense_variant                  |
| 27 | OM-CMML | DNMT3A | NM_175629.2:c.703delG                    | NP_783328.1:p.Glu235SerfsTer81     | 46,05 | deletion  | frameshift_variant                |
| 27 | OM-CMML | TET2   | NM_001127208.2:c.4668_4671delTGTC        | NP_001120680.1:p.Val1557ThrfsTer13 | 44,56 | deletion  | frameshift_variant                |

|    |         |        |                                 |                                    |       |           |                                        |
|----|---------|--------|---------------------------------|------------------------------------|-------|-----------|----------------------------------------|
| 27 | OM-CMML | SF3B1  | NM_012433.2:c.2098A>G           | NP_036565.2:p.Lys700Glu            | 44,06 | snv       | missense_variant                       |
| 27 | OM-CMML | SETBP1 | NM_015559.2:c.2608G>A           | NP_056374.2:p.Gly870Ser            | 15,96 | snv       | missense_variant                       |
| 28 | OM-CMML | TET2   | NM_001127208.2:c.3985delC       | NP_001120680.1:p.Leu1329CysfsTer34 | 49,15 | deletion  | frameshift_variant                     |
| 29 | OM-CMML | SH2B3  | NM_005475.2:c.622G>C            | NP_005466.1:p.Glu208Gln            | 48,49 | snv       | missense_variant                       |
| 29 | OM-CMML | SRSF2  | NM_003016.4:c.284C>A            | NP_003007.2:p.Pro95His             | 44,38 | snv       | missense_variant                       |
| 29 | OM-CMML | IDH2   | NM_002168.2:c.419G>A            | NP_002159.2:p.Arg140Gln            | 39,69 | snv       | missense_variant                       |
| 29 | OM-CMML | SH2B3  | NM_005475.2:c.1283_1284delAC    | NP_005466.1:p.His428ProfsTer27     | 22,63 | deletion  | frameshift_variant                     |
| 29 | OM-CMML | ASXL1  | NM_015338.5:c.1552G>T           | NP_056153.2:p.Glu518Ter            | 22,05 | snv       | stop_gained                            |
| 29 | OM-CMML | JAK2   | NM_004972.3:c.1849G>T           | NP_004963.1:p.Val617Phe            | 3,6   | snv       | missense_variant                       |
| 30 | OM-CMML | TET2   | NM_001127208.2:c.822delC        | NP_001120680.1:p.Asn275IlefsTer18  | 52,27 | deletion  | frameshift_variant                     |
| 30 | OM-CMML | SRSF2  | NM_003016.4:c.284C>T            | NP_003007.2:p.Pro95Leu             | 42,29 | snv       | missense_variant                       |
| 30 | OM-CMML | TET2   | NM_001127208.2:c.3384T>A        | NP_001120680.1:p.Tyr1128Ter        | 8,64  | snv       | stop_gained                            |
| 30 | OM-CMML | TET2   | NM_001127208.2:c.2400_2401delTA | NP_001120680.1:p.His800GlnfsTer15  | 2,86  | deletion  | frameshift_variant                     |
| 31 | OM-CMML | SF3B1  | NM_012433.2:c.1986C>G           | NP_036565.2:p.His662Gln            | 36,74 | snv       | missense_variant                       |
| 32 | OM-CMML | SF3B1  | NM_012433.2:c.2098A>G           | NP_036565.2:p.Lys700Glu            | 42,29 | snv       | missense_variant                       |
| 32 | OM-CMML | TET2   | NM_001127208.2:c.1873delA       | NP_001120680.1:p.Thr625HisfsTer14  | 41,95 | deletion  | frameshift_variant                     |
| 32 | OM-CMML | TET2   | NM_001127208.2:c.5562dupT       | NP_001120680.1:p.Leu1855SerfsTer4  | 12,08 | insertion | frameshift_variant                     |
| 33 | OM-CMML | SRSF2  | NM_003016.4:c.284C>T            | NP_003007.2:p.Pro95Leu             | 40,3  | snv       | missense_variant                       |
| 33 | OM-CMML | TET2   | NM_001127208.2:c.4537G>C        | NP_001120680.1:p.Glu1513Gln        | 39,29 | snv       | missense_variant,splice_region_variant |
| 33 | OM-CMML | TET2   | NM_001127208.2:c.2279_2280delTT | NP_001120680.1:p.Phe760SerfsTer8   | 37,62 | deletion  | frameshift_variant                     |
| 34 | OM-CMML | TET2   | NM_001127208.2:c.2373T>A        | NP_001120680.1:p.Tyr791Ter         | 41,84 | snv       | stop_gained                            |
| 34 | OM-CMML | TET2   | NM_001127208.2:c.3732_3733delCT | NP_001120680.1:p.Tyr1245LeufsTer22 | 41,07 | deletion  | frameshift_variant                     |
| 34 | OM-CMML | ZRSR2  | NM_005089.3:c.771+1G>C          |                                    | 30,92 | snv       | splice_donor_variant                   |
| 35 | OM-CMML | SRSF2  | NM_003016.4:c.130T>C            | NP_003007.2:p.Tyr44His             | 31,07 | snv       | missense_variant                       |
| 35 | OM-CMML | TET2   | NM_001127208.2:c.4020dupT       | NP_001120680.1:p.Ala1341CysfsTer3  | 31,01 | insertion | frameshift_variant                     |
| 35 | OM-CMML | TET2   | NM_001127208.2:c.3308_3309delAT | NP_001120680.1:p.Asn1103IlefsTer26 | 29,2  | deletion  | frameshift_variant                     |
| 35 | OM-CMML | ZRSR2  | NM_005089.3:c.709delC           | NP_005080.1:p.Leu237Ter            | 9,89  | deletion  | frameshift_variant                     |

|    |         |             |                                              |                                    |       |          |                         |
|----|---------|-------------|----------------------------------------------|------------------------------------|-------|----------|-------------------------|
| 36 | OM-CMML | TET2        | NM_001127208.2:c.2671C>T                     | NP_001120680.1:p.Gln891Ter         | 45,34 | snv      | stop_gained             |
| 36 | OM-CMML | SRSF2       | NM_003016.4:c.284C>A                         | NP_003007.2:p.Pro95His             | 44    | snv      | missense_variant        |
| 36 | OM-CMML | IDH1        | NM_005896.2:c.394C>T                         | NP_005887.2:p.Arg132Cys            | 20,59 | snv      | missense_variant        |
| 36 | OM-CMML | TET2        | NM_001127208.2:c.1930C>T                     | NP_001120680.1:p.Gln644Ter         | 18,48 | snv      | stop_gained             |
| 36 | OM-CMML | TET2        | NM_001127208.2:c.5502_5518delGGGTGGCTTCTGGTG | NP_001120680.1:p.Gln1834HisfsTer6  | 4,38  | deletion | frameshift_variant      |
| 36 | OM-CMML | RUNX1       | NM_001754.4:c.1174C>T                        | NP_001745.2:p.Gln392Ter            | 2,15  | snv      | stop_gained             |
| 37 | OM-CMML | TET2        | NM_001127208.2:c.4112T>A                     | NP_001120680.1:p.Val1371Asp        | 47,53 | snv      | missense_variant        |
| 37 | OM-CMML | TET2        | NM_001127208.2:c.3594+2T>C                   |                                    | 46,38 | snv      | splice_donor_variant    |
| 37 | OM-CMML | SRSF2       | NM_003016.4:c.284C>T                         | NP_003007.2:p.Pro95Leu             | 42,89 | snv      | missense_variant        |
| 38 | OM-CMML | ZRSR2       | NM_005089.3:c.1252delC                       | NP_005080.1:p.His418ThrfsTer?      | 88,89 | deletion | frameshift_variant      |
| 39 | OM-CMML | TET2        | NM_001127208.2:c.5273C>G                     | NP_001120680.1:p.Ser1758Ter        | 56,95 | snv      | stop_gained             |
| 39 | OM-CMML | SRSF2       | NM_003016.4:c.284C>G                         | NP_003007.2:p.Pro95Arg             | 46,11 | snv      | missense_variant        |
| 40 | OM-CMML | TET2        | NM_001127208.2:c.5647A>C                     | NP_001120680.1:p.Thr1883Pro        | 39,77 | snv      | missense_variant        |
| 40 | OM-CMML | SF3B1       | NM_012433.2:c.1873C>T                        | NP_036565.2:p.Arg625Cys            | 37,85 | snv      | missense_variant        |
| 41 | OM-CMML | <b>TET2</b> | NM_001127208.2:c.5363delA                    | NP_001120680.1:p.Asp1788AlafsTer32 | 6,83  | deletion | frameshift_variant      |
| 41 | OM-CMML | <b>TET2</b> | NM_001127208.2:c.4975delT                    | NP_001120680.1:p.Tyr1659IlefsTer36 | 7,3   | deletion | frameshift_variant      |
| 41 | OM-CMML | <b>TET2</b> | NM_001127208.2:c.4393C>T                     | NP_001120680.1:p.Arg1465Ter        | 29,88 | snv      | stop_gained             |
| 41 | OM-CMML | <b>TET2</b> | NM_001127208.2:c.3595-1G>T                   |                                    | 25,18 | snv      | splice_acceptor_variant |
| 42 | CMML    | TET2        | NM_001127208.2:c.3570delT                    | NP_001120680.1:p.Gln1191ArgfsTer35 | 43,6  | deletion | frameshift_variant      |
| 42 | CMML    | SF3B1       | NM_012433.2:c.2098A>G                        | NP_056374.2:p.Lys700Glu            | 42,9  | snv      | missense_variant        |
| 42 | CMML    | CBL         | NM_005188.3:c.1211G>A                        | NP_005179.2:p.Cys404Tyr            | 40,5  | snv      | missense_variant        |
| 42 | CMML    | TET2        | NM_001127208.2:c.4570C>T                     | NP_001120680.1:p.Gln1524Ter        | 40    | snv      | stop_gained             |
| 42 | CMML    | ASXL1       | NM_015338.5:c.1900_1922del23                 | NP_056153.2:p.Glu635ArgfsTer15     | 27,45 | deletion | frameshift_variant      |
| 43 | CMML    | CBL         | NM_005188.3:c.1255T>A                        | NP_005179.2:p.Cys419Ser            | 46,34 | snv      | missense_variant        |
| 43 | CMML    | SRSF2       | NM_003016.4:c.284C>A                         | NP_003007.2:p.Pro95His             | 45,67 | snv      | missense_variant        |
| 43 | CMML    | TET2        | NM_001127208.2:c.3743T>G                     | NP_001120680.1:p.Leu1248Arg        | 42,64 | snv      | missense_variant        |
| 43 | CMML    | ASXL1       | NM_015338.5:c.2498_2499delGT                 | NP_056153.2:p.Ser833ThrfsTer17     | 40,83 | deletion | frameshift_variant      |

|    |      |        |                                             |                                    |       |           |                      |
|----|------|--------|---------------------------------------------|------------------------------------|-------|-----------|----------------------|
| 43 | CMML | CBL    | NM_005188.3:c.1618C>T                       | NP_005179.2:p.Arg540Ter            | 34,86 | snv       | stop_gained          |
| 44 | CMML | DNMT3A | NM_175629.2:c.2663T>A                       | NP_783328.1:p.Leu888Gln            | 4,65  | snv       | missense_variant     |
| 45 | CMML | SF3B1  | NM_012433.2:c.1873C>T                       | NP_036565.2:p.Arg625Cys            | 40,84 | snv       | missense_variant     |
| 45 | CMML | CBL    | NM_005188.3:c.826G>T                        | NP_005179.2:p.Glu276Ter            | 2,87  | snv       | stop_gained          |
| 46 | CMML | TET2   | NM_001127208.2:c.3954+1G>A                  |                                    | 29,82 | snv       | splice_donor_variant |
| 46 | CMML | JAK2   | NM_004972.3:c.1849G>T                       | NP_004963.1:p.Val617Phe            | 7,88  | snv       | missense_variant     |
| 46 | CMML | TET2   | NM_001127208.2:c.4977_4978dupTA             | NP_001120680.1:p.Arg1660IlefsTer36 | 4,18  | insertion | frameshift_variant   |
| 47 | CMML | U2AF1  | NM_006758.2:c.470A>G                        | NP_006749.1:p.Gln157Arg            | 43,79 | snv       | missense_variant     |
| 47 | CMML | RUNX1  | NM_001754.4:c.602G>A                        | NP_001745.2:p.Arg201Gln            | 37,71 | snv       | missense_variant     |
| 47 | CMML | ASXL1  | NM_015338.5:c.1934dupG                      | NP_056153.2:p.Gly646TrpfsTer12     | 28,35 | insertion | frameshift_variant   |
| 48 | CMML | CBL    | NM_005188.3:c.1290_1292delGGT               | NP_005179.2:p.Val431del            | 87,16 | deletion  | inframe_deletion     |
| 48 | CMML | ASXL1  | NM_015338.5:c.3359A>T                       | NP_056153.2:p.Lys1120Met           | 48,48 | snv       | missense_variant     |
| 48 | CMML | TET2   | NM_001127208.2:c.3385delG                   | NP_001120680.1:p.Asp1129IlefsTer8  | 45,57 | deletion  | frameshift_variant   |
| 48 | CMML | TET2   | NM_001127208.2:c.3781C>T                    | NP_001120680.1:p.Arg1261Cys        | 44,63 | snv       | missense_variant     |
| 48 | CMML | SRSF2  | NM_003016.4:c.284C>T                        | NP_003007.2:p.Pro95Leu             | 40,86 | snv       | missense_variant     |
| 48 | CMML | TET2   | NM_001127208.2:c.5079C>G                    | NP_001120680.1:p.Tyr1693Ter        | 1,99  | snv       | stop_gained          |
| 49 | CMML | SRSF2  | NM_003016.4:c.284C>G                        | NP_003007.2:p.Pro95Arg             | 52,54 | snv       | missense_variant     |
| 49 | CMML | ASXL1  | NM_015338.5:c.1934dupG                      | NP_056153.2:p.Gly646TrpfsTer12     | 33,33 | insertion | frameshift_variant   |
| 50 | CMML | SF3B1  | NM_012433.2:c.1986C>G                       | NP_036565.2:p.His662Gln            | 47,18 | snv       | missense_variant     |
| 51 | CMML | ZRSR2  | NM_005089.3:c.91C>T                         | NP_005080.1:p.Arg31Trp             | 73,94 | snv       | missense_variant     |
| 51 | CMML | TET2   | NM_001127208.2:c.331A>T                     | NP_001120680.1:p.Lys111Ter         | 29,51 | snv       | stop_gained          |
| 51 | CMML | SETBP1 | NM_015559.2:c.2959C>T                       | NP_056374.2:p.Arg987Trp            | 2,95  | snv       | missense_variant     |
| 52 | CMML | SRSF2  | NM_003016.4:c.284C>T                        | NP_003007.2:p.Pro95Leu             | 24,32 | snv       | missense_variant     |
| 52 | CMML | TET2   | NM_001127208.2:c.2494delG                   | NP_001120680.1:p.Val832PhefsTer9   | 20,28 | deletion  | frameshift_variant   |
| 52 | CMML | TET2   | NM_001127208.2:c.333A>T                     | NP_001120680.1:p.Lys111Asn         | 17,32 | snv       | missense_variant     |
| 52 | CMML | TET2   | NM_001127208.2:c.333delA                    | NP_001120680.1:p.Lys111AsnfsTer2   | 17    | deletion  | frameshift_variant   |
| 52 | CMML | TET2   | NM_001127208.2:c.3690_3703delCCTGGTGTGGGAAG | NP_001120680.1:p.Ile1230MetfsTer8  | 13,04 | deletion  | frameshift_variant   |

|    |      |       |                                      |                                    |       |           |                    |
|----|------|-------|--------------------------------------|------------------------------------|-------|-----------|--------------------|
| 53 | CMML | TET2  | NM_001127208.2:c.1585dupT            | NP_001120680.1:p.Cys529LeufsTer38  | 24,09 | insertion | frameshift_variant |
| 53 | CMML | TET2  | NM_001127208.2:c.1236delT            | NP_001120680.1:p.Pro413HisfsTer14  | 19,73 | deletion  | frameshift_variant |
| 54 | CMML | IDH2  | NM_002168.2:c.419G>A                 | NP_002159.2:p.Arg140Gln            | 48,46 | snv       | missense_variant   |
| 54 | CMML | U2AF1 | NM_006758.2:c.470A>G                 | NP_006749.1:p.Gln157Arg            | 47,41 | snv       | missense_variant   |
| 54 | CMML | ASXL1 | NM_015338.5:c.1934dupG               | NP_056153.2:p.Gly646TrpfsTer12     | 32,98 | insertion | frameshift_variant |
| 54 | CMML | NRAS  | NM_002524.4:c.38G>A                  | NP_002515.1:p.Gly13Asp             | 2,63  | snv       | missense_variant   |
| 55 | CMML | TET2  | NM_001127208.2:c.4618C>T             | NP_001120680.1:p.Gln1540Ter        | 45,1  | snv       | stop_gained        |
| 55 | CMML | CBL   | NM_005188.3:c.1211G>A                | NP_005179.2:p.Cys404Tyr            | 36,6  | snv       | missense_variant   |
| 55 | CMML | ASXL1 | NM_015338.5:c.2338C>T                | NP_056153.2:p.Gln780Ter            | 15,5  | snv       | stop_gained        |
| 55 | CMML | EZH2  | NM_004456.4:c.2216T>C                | NP_004447.2:p.Leu739Pro            | 11,9  | snv       | missense_variant   |
| 55 | CMML | SRSF2 | NM_003016.4:c.284C>A                 | NP_003007.2:p.Pro95His             | 9,61  | snv       | missense_variant   |
| 55 | CMML | CBL   | NM_005188.3:c.1246T>C                | NP_005179.2:p.Cys416Arg            | 8,8   | snv       | missense_variant   |
| 56 | CMML | TET2  | NM_001127208.2:c.2713_2716del        | NP_001120680.1:p.Asp905CysfsTer15  | 44,4  | snv       | missense_variant   |
| 57 | CMML | SRSF2 | NM_003016.4:c.284C>G                 | NP_003007.2:p.Pro95Arg             | 26,11 | snv       | missense_variant   |
| 57 | CMML | TET2  | NM_001127208.2:c.5582G>T             | NP_001120680.1:p.Gly1861Val        | 25,97 | snv       | missense_variant   |
| 57 | CMML | TET2  | NM_001127208.2:c.3812dupG            | NP_001120680.1:p.Cys1271TrpfsTer29 | 15,64 | insertion | frameshift_variant |
| 58 | CMML | TET2  | NM_001127208.2:c.4909delC            | NP_001120680.1:p.Leu1637TyrfsTer58 | 31,2  | deletion  | frameshift_variant |
| 58 | CMML | SF3B1 | NM_012433.2:c.2098A>G                | NP_056374.2:p.Lys700Glu            | 30,2  | snv       | missense_variant   |
| 58 | CMML | TET2  | NM_001127208.2:c.2887C>T             | NP_001120680.1:p.Gln963Ter         | 12,9  | snv       | stop_gained        |
| 59 | CMML | TET2  | NM_001127208.2:c.3640C>T             | NP_001120680.1:p.Arg1214Trp        | 48,23 | snv       | missense_variant   |
| 59 | CMML | TET2  | NM_001127208.2:c.4164_4165delGCinsAT | NP_001120680.1:p.MetGln1388IleTer  | 40,02 | mnp       | stop_gained        |
| 59 | CMML | TET2  | NM_001127208.2:c.1876C>T             | NP_001120680.1:p.Gln626Ter         | 7,38  | snv       | stop_gained        |
| 60 | CMML | SF3B1 | NM_012433.2:c.1986C>G                | NP_036565.2:p.His662Gln            | 7,31  | snv       | missense_variant   |
| 60 | CMML | IDH2  | NM_002168.2:c.352C>T                 | NP_002159.2:p.Pro118Ser            | 1,89  | snv       | missense_variant   |
| 61 | CMML | TET2  | NM_001127208.2:c.3230dupA            | NP_001120680.1:p.His1077GlnfsTer27 | 42,45 | insertion | frameshift_variant |
| 61 | CMML | SH2B3 | NM_005475.2:c.393delG                | NP_005466.1:p.Cys133AlafsTer64     | 35,23 | deletion  | frameshift_variant |
| 62 | CMML | IDH2  | NM_002168.2:c.419G>A                 | NP_002159.2:p.Arg140Gln            | 46,52 | snv       | missense_variant   |

|    |      |       |                               |                                    |       |           |                    |
|----|------|-------|-------------------------------|------------------------------------|-------|-----------|--------------------|
| 62 | CMML | JAK2  | NM_004972.3:c.1849G>T         | NP_004963.1:p.Val617Phe            | 35,11 | snv       | missense_variant   |
| 63 | CMML | TET2  | NM_001127208.2:c.5093delA     | NP_001120680.1:p.Asn1698ThrfsTer21 | 55,42 | deletion  | frameshift_variant |
| 63 | CMML | ASXL1 | NM_015338.5:c.4180G>T         | NP_056153.2:p.Glu1394Ter           | 41,51 | snv       | stop_gained        |
| 63 | CMML | TET2  | NM_001127208.2:c.3640C>T      | NP_001120680.1:p.Arg1214Trp        | 25,62 | snv       | missense_variant   |
| 63 | CMML | SH2B3 | NM_005475.2:c.1174C>T         | NP_005466.1:p.Arg392Trp            | 14,81 | snv       | missense_variant   |
| 63 | CMML | TET2  | NM_001127208.2:c.3780delT     | NP_001120680.1:p.Arg1261AlafsTer5  | 12,14 | deletion  | frameshift_variant |
| 64 | CMML | TET2  | NM_001127208.2:c.5456T>G      | NP_001120680.1:p.Leu1819Ter        | 31,93 | snv       | stop_gained        |
| 64 | CMML | TET2  | NM_001127208.2:c.943delT      | NP_001120680.1:p.Ser315ProfsTer32  | 30,95 | deletion  | frameshift_variant |
| 64 | CMML | CBL   | NM_005188.3:c.2599C>T         | NP_005179.2:p.Gln867Ter            | 16,28 | snv       | stop_gained        |
| 64 | CMML | TET2  | NM_001127208.2:c.5618T>C      | NP_001120680.1:p.Ile1873Thr        | 9,95  | snv       | missense_variant   |
| 64 | CMML | NRAS  | NM_002524.4:c.35G>A           | NP_002515.1:p.Gly12Asp             | 8,1   | snv       | missense_variant   |
| 65 | CMML | ASXL1 | NM_015338.5:c.1934dupG        | NP_056153.2:p.Gly646TrpfsTer12     | 36,29 | insertion | frameshift_variant |
| 66 | CMML | TET2  | NM_001127208.2:c.2507_2510del | NP_001120680.1:p.Asn836IlefsTer4   | 78,9  | deletion  | frameshift_variant |
| 66 | CMML | CBL   | NM_005188.3:c.1101_1103del    | p.Gln367_Tyr368delinsHis           | 42,6  | deletion  | frameshift_variant |
| 66 | CMML | RUNX1 | NM_001754.4:c.167T>C          | NP_001745.2:p.Leu56Ser             | 34,1  | snv       | missense_variant   |
| 66 | CMML | TET2  | NM_001127208.2:c.4138C>T      | NP_001120680.1:p.His1380Tyr        | 13,5  | snv       | missense_variant   |
| 66 | CMML | TET2  | NM_001127208.2:c.3928A>C      | NP_001120680.1:p.Lys1310Gln        | 5     | snv       | missense_variant   |
| 67 | CMML | TET2  | NM_001127208.2:c.4035T>G      | NP_001120680.1:p.Tyr1345Ter        | 29,64 | snv       | stop_gained        |
| 67 | CMML | TET2  | NM_001127208.2:c.822delC      | NP_001120680.1:p.Asn275IlefsTer18  | 25,69 | deletion  | frameshift_variant |
| 67 | CMML | NRAS  | NM_002524.4:c.173C>T          | NP_002515.1:p.Thr58Ile             | 4,85  | snv       | missense_variant   |
| 68 | CMML | SRSF2 | NM_003016.4:c.284C>T          | NP_003007.2:p.Pro95Leu             | 41,48 | snv       | missense_variant   |
| 68 | CMML | KRAS  | NM_033360.2:c.437C>T          | NP_203524.1:p.Ala146Val            | 41,36 | snv       | missense_variant   |
| 68 | CMML | TET2  | NM_001127208.2:c.3869C>G      | NP_001120680.1:p.Ser1290Ter        | 40,35 | snv       | stop_gained        |
| 68 | CMML | JAK2  | NM_004972.3:c.1849G>T         | NP_004963.1:p.Val617Phe            | 14,41 | snv       | missense_variant   |
| 69 | CMML | ZRSR2 | NM_005089.3:c.575delA         | NP_005080.1:p.Asn192IlefsTer46     | 54,55 | deletion  | frameshift_variant |
| 69 | CMML | TET2  | NM_001127208.2:c.3892T>G      | NP_001120680.1:p.Cys1298Gly        | 38,3  | snv       | missense_variant   |
| 69 | CMML | TET2  | NM_001127208.2:c.4210C>T      | NP_001120680.1:p.Arg1404Ter        | 38,27 | snv       | stop_gained        |

|    |      |        |                                   |                                    |       |           |                    |
|----|------|--------|-----------------------------------|------------------------------------|-------|-----------|--------------------|
| 70 | CMML | ASXL1  | NM_015338.5:c.1774C>T             | NP_056153.2:p.Gln592Ter            | 39,1  | snv       | stop_gained        |
| 70 | CMML | CBL    | NM_005188.3:c.1111T>A             | NP_005179.2:p.Tyr371Asn            | 38,62 | snv       | missense_variant   |
| 70 | CMML | TET2   | NM_001127208.2:c.5059C>T          | NP_001120680.1:p.Gln1687Ter        | 34,86 | snv       | stop_gained        |
| 70 | CMML | TET2   | NM_001127208.2:c.3273dupA         | NP_001120680.1:p.Pro1092ThrfsTer12 | 33,61 | insertion | frameshift_variant |
| 71 | CMML | TET2   | NM_001127208.2:c.2191C>T          | NP_001120680.1:p.Gln731Ter         | 82,86 | snv       | stop_gained        |
| 71 | CMML | TET2   | NM_001127208.2:c.2190_2191insGACA | NP_001120680.1:p.Gln731AspfsTer24  | 77,06 | insertion | frameshift_variant |
| 71 | CMML | ASXL1  | NM_015338.5:c.2249_2250delCC      | NP_056153.2:p.Pro750ArgfsTer23     | 43,52 | deletion  | frameshift_variant |
| 72 | CMML | TET2   | NM_001127208.2:c.5140_5141delAA   | NP_001120680.1:p.Asn1714CysfsTer14 | 42,62 | deletion  | frameshift_variant |
| 73 | CMML | SF3B1  | NM_012433.2:c.1996A>G             | NP_036565.2:p.Lys666Glu            | 45,46 | snv       | missense_variant   |
| 73 | CMML | TET2   | NM_001127208.2:c.2674C>T          | NP_001120680.1:p.Gln892Ter         | 32,59 | snv       | stop_gained        |
| 73 | CMML | TP53   | NM_000546.5:c.817C>T              | NP_000537.3:p.Arg273Cys            | 17,43 | snv       | missense_variant   |
| 74 | CMML | SRSF2  | NM_003016.4:c.284C>T              | NP_003007.2:p.Pro95Leu             | 34,99 | snv       | missense_variant   |
| 74 | CMML | TET2   | NM_001127208.2:c.4561delG         | NP_001120680.1:p.Val1521SerfsTer50 | 34,2  | deletion  | frameshift_variant |
| 74 | CMML | TET2   | NM_001127208.2:c.4272delT         | NP_001120680.1:p.Asp1425ThrfsTer23 | 22,67 | deletion  | frameshift_variant |
| 74 | CMML | KRAS   | NM_033360.2:c.35G>A               | NP_203524.1:p.Gly12Asp             | 14,67 | snv       | missense_variant   |
| 74 | CMML | DNMT3A | NM_175629.2:c.839_840dupAC        | NP_783328.1:p.Glu281ThrfsTer36     | 2,71  | insertion | frameshift_variant |
| 75 | CMML | ASXL1  | NM_015338.5:c.1773C>G             | NP_056153.2:p.Tyr591Ter            | 47,36 | snv       | stop_gained        |
| 75 | CMML | TET2   | NM_001127208.2:c.5500C>T          | NP_001120680.1:p.Gln1834Ter        | 46,06 | snv       | stop_gained        |
| 75 | CMML | ASXL1  | NM_015338.5:c.1819G>T             | NP_056153.2:p.Gly607Cys            | 29,72 | snv       | missense_variant   |
| 75 | CMML | TET2   | NM_001127208.2:c.4210C>T          | NP_001120680.1:p.Arg1404Ter        | 24,53 | snv       | stop_gained        |
| 75 | CMML | KRAS   | NM_033360.2:c.40G>A               | NP_203524.1:p.Val14Ile             | 19,25 | snv       | missense_variant   |
| 75 | CMML | TET2   | NM_001127208.2:c.3921delG         | NP_001120680.1:p.Lys1308SerfsTer55 | 15,62 | deletion  | frameshift_variant |
| 75 | CMML | TP53   | NM_000546.5:c.818G>A              | NP_000537.3:p.Arg273His            | 10,99 | snv       | missense_variant   |
| 75 | CMML | JAK2   | NM_004972.3:c.1849G>T             | NP_004963.1:p.Val617Phe            | 3,63  | snv       | missense_variant   |
| 75 | CMML | TET2   | NM_001127208.2:c.3845G>A          | NP_001120680.1:p.Gly1282Asp        | 2,88  | snv       | missense_variant   |
| 76 | CMML | ZRSR2  | NM_005089.3:c.847G>C              | NP_005080.1:p.Ala283Pro            | 21,75 | snv       | missense_variant   |
| 76 | CMML | TET2   | NM_001127208.2:c.5500C>T          | NP_001120680.1:p.Gln1834Ter        | 14,36 | snv       | stop_gained        |

|    |      |        |                                      |                                    |       |          |                    |
|----|------|--------|--------------------------------------|------------------------------------|-------|----------|--------------------|
| 76 | CMML | TET2   | NM_001127208.2:c.1061C>A             | NP_001120680.1:p.Ser354Ter         | 14,06 | snv      | stop_gained        |
| 76 | CMML | DNMT3A | NM_175629.2:c.2729C>T                | NP_783328.1:p.Ala910Val            | 3,03  | snv      | missense_variant   |
| 76 | CMML | DNMT3A | NM_175629.2:c.2711C>T                | NP_783328.1:p.Pro904Leu            | 1,6   | snv      | missense_variant   |
| 77 | CMML | TET2   | NM_001127208.2:c.4165C>T             | NP_001120680.1:p.Gln1389Ter        | 49,5  | snv      | missense_variant   |
| 77 | CMML | SF3B1  | NM_012433.2:c.2098A>G                | NP_056374.2:p.Lys700Glu            | 47,2  | snv      | missense_variant   |
| 77 | CMML | TET2   | NM_001127208.2:c.5381delC            | NP_001120680.1:p.Ala1794ValfsTer26 | 45,9  | deletion | frameshift_variant |
| 77 | CMML | SETBP1 | NM_015559.2:c.2900T>C                | NP_056374.2:p.Phe967Ser            | 44,2  | snv      | missense_variant   |
| 77 | CMML | MPL    | NM_005373.2:c.1544G>T                | NP_005364.1:p.Trp515Leu            | 8,2   | snv      | missense_variant   |
| 77 | CMML | MPL    | NM_005373.2:c.1514G>A                | NP_005364.1:p.Ser505Asn            | 6,1   | snv      | missense_variant   |
| 78 | CMML | ASXL1  | NM_015338.5:c.2077C>T                | NP_056153.2:p.Arg693Ter            | 41,4  | snv      | stop_gained        |
| 78 | CMML | SRSF2  | NM_003016.4:c.284C>A                 | NP_003007.2:p.Pro95His             | 40,25 | snv      | missense_variant   |
| 78 | CMML | TET2   | NM_001127208.2:c.5104C>T             | NP_001120680.1:p.Gln1702Ter        | 40    | snv      | stop_gained        |
| 78 | CMML | TET2   | NM_001127208.2:c.3574G>T             | NP_001120680.1:p.Gly1192Ter        | 39,9  | snv      | stop_gained        |
| 79 | CMML | KRAS   | NM_033360.2:c.34G>C                  | NP_203524.1:p.Gly12Arg             | 38,82 | snv      | missense_variant   |
| 80 | CMML | SRSF2  | NM_003016.4:c.284C>A                 | NP_003007.2:p.Pro95His             | 42,57 | snv      | missense_variant   |
| 80 | CMML | TET2   | NM_001127208.2:c.4075C>T             | NP_001120680.1:p.Arg1359Cys        | 39,28 | snv      | missense_variant   |
| 80 | CMML | CBL    | NM_005188.3:c.1210T>C                | NP_005179.2:p.Cys404Arg            | 4,23  | snv      | missense_variant   |
| 81 | CMML | TET2   | NM_001127208.2:c.822delC             | NP_001120680.1:p.Asn275IlefsTer18  | 21,87 | deletion | frameshift_variant |
| 81 | CMML | TET2   | NM_001127208.2:c.4063_4064delGCinsTA | NP_001120680.1:p.Ala1355Ter        | 21,39 | mnp      | stop_gained        |
| 82 | CMML | NRAS   | NM_002524.4:c.35G>A                  | NP_002515.1:p.Gly12Asp             | 15,07 | snv      | missense_variant   |
| 82 | CMML | NRAS   | NM_002524.4:c.35G>T                  | NP_002515.1:p.Gly12Val             | 15,07 | snv      | missense_variant   |
| 82 | CMML | KRAS   | NM_033360.2:c.34G>C                  | NP_203524.1:p.Gly12Arg             | 12,93 | snv      | missense_variant   |
| 82 | CMML | NRAS   | NM_002524.4:c.190T>G                 | NP_002515.1:p.Tyr64Asp             | 4,9   | snv      | missense_variant   |
| 82 | CMML | TET2   | NM_001127208.2:c.5268_5274delTCATTCA | NP_001120680.1:p.His1757LeufsTer4  | 3,93  | deletion | frameshift_variant |
| 82 | CMML | JAK2   | NM_004972.3:c.1849G>T                | NP_004963.1:p.Val617Phe            | 2,7   | snv      | missense_variant   |
| 82 | CMML | CBL    | NM_005188.3:c.1211G>A                | NP_005179.2:p.Cys404Tyr            | 2,47  | snv      | missense_variant   |
| 82 | CMML | KRAS   | NM_033360.2:c.179G>A                 | NP_203524.1:p.Gly60Asp             | 2,32  | snv      | missense_variant   |



|    |      |       |                                   |                                    |       |           |                    |
|----|------|-------|-----------------------------------|------------------------------------|-------|-----------|--------------------|
| 83 | CMML | SRSF2 | NM_003016.4:c.284C>A              | NP_003007.2:p.Pro95His             | 48,15 | snv       | missense_variant   |
| 83 | CMML | ETV6  | NM_001987.4:c.305_306insG         | NP_001978.1:p.Phe102LeufsTer10     | 46,62 | insertion | frameshift_variant |
| 83 | CMML | TET2  | NM_001127208.2:c.1516delA         | NP_001120680.1:p.Arg506AspfsTer27  | 42,99 | deletion  | frameshift_variant |
| 83 | CMML | TET2  | NM_001127208.2:c.3869C>T          | NP_001120680.1:p.Ser1290Leu        | 37,17 | snv       | missense_variant   |
| 83 | CMML | TET2  | NM_001127208.2:c.2474delC         | NP_001120680.1:p.Ser825Ter         | 2,54  | deletion  | frameshift_variant |
| 83 | CMML | TET2  | NM_001127208.2:c.3813C>G          | NP_001120680.1:p.Cys1271Trp        | 2,16  | snv       | missense_variant   |
| 83 | CMML | TET2  | NM_001127208.2:c.3640C>T          | NP_001120680.1:p.Arg1214Trp        | 1,66  | snv       | missense_variant   |
| 84 | CMML | TET2  | NM_001127208.2:c.2784delT         | NP_001120680.1:p.Pro929LeufsTer24  | 30,43 | deletion  | frameshift_variant |
| 84 | CMML | TET2  | NM_001127208.2:c.3356dupT         | NP_001120680.1:p.Leu1119PhefsTer11 | 10,53 | insertion | frameshift_variant |
| 85 | CMML | U2AF1 | NM_006758.2:c.467G>A              | NP_006749.1:p.Arg156His            | 50,61 | snv       | missense_variant   |
| 85 | CMML | TET2  | NM_001127208.2:c.4132T>C          | NP_001120680.1:p.Cys1378Arg        | 47,6  | snv       | missense_variant   |
| 85 | CMML | NRAS  | NM_002524.4:c.37G>C               | NP_002515.1:p.Gly13Arg             | 15,64 | snv       | missense_variant   |
| 85 | CMML | RUNX1 | NM_001754.4:c.592G>A              | NP_001745.2:p.Asp198Asn            | 14,07 | snv       | missense_variant   |
| 85 | CMML | NRAS  | NM_002524.4:c.35G>C               | NP_002515.1:p.Gly12Ala             | 8,18  | snv       | missense_variant   |
| 85 | CMML | RUNX1 | NM_001754.4:c.1022_1023insTTGGC   | NP_001745.2:p.Ile342TrpfsTer254    | 5,98  | insertion | frameshift_variant |
| 86 | CMML | TET2  | NM_001127208.2:c.2305delC         | NP_001120680.1:p.Gln769SerfsTer44  | 42,01 | deletion  | frameshift_variant |
| 86 | CMML | TET2  | NM_001127208.2:c.5140_5141delAA   | NP_001120680.1:p.Asn1714CysfsTer14 | 9,09  | deletion  | frameshift_variant |
| 87 | CMML | SF3B1 | NM_012433.2:c.1997A>G             | NP_036565.2:p.Lys666Arg            | 34,73 | snv       | missense_variant   |
| 87 | CMML | TET2  | NM_001127208.2:c.4268T>A          | NP_001120680.1:p.Val1423Asp        | 2,37  | snv       | missense_variant   |
| 88 | CMML | TP53  | NM_000546.5:c.818G>A              | NP_000537.3:p.Arg273His            | 71,46 | snv       | missense_variant   |
| 88 | CMML | PRPF8 | NM_006445.3:c.4792G>A             | NP_006436.3:p.Asp1598Asn           | 43,98 | snv       | missense_variant   |
| 88 | CMML | RUNX1 | NM_001754.4:c.422C>A              | NP_001745.2:p.Ser141Ter            | 34,33 | snv       | stop_gained        |
| 88 | CMML | CBL   | NM_005188.3:c.1259G>A             | NP_005179.2:p.Arg420Gln            | 1,54  | snv       | missense_variant   |
| 89 | CMML | SRSF2 | NM_003016.4:c.284C>A              | NP_003007.2:p.Pro95His             | 49,76 | snv       | missense_variant   |
| 89 | CMML | TET2  | NM_001127208.2:c.2207delC         | NP_001120680.1:p.Ser736TyrfsTer15  | 48,55 | deletion  | frameshift_variant |
| 89 | CMML | TET2  | NM_001127208.2:c.4661_4664delCAGA | NP_001120680.1:p.Thr1554SerfsTer16 | 27,45 | deletion  | frameshift_variant |
| 89 | CMML | TET2  | NM_001127208.2:c.1630C>T          | NP_001120680.1:p.Arg544Ter         | 12,07 | snv       | stop_gained        |

|    |      |                         |                                       |                                    |       |           |                         |
|----|------|-------------------------|---------------------------------------|------------------------------------|-------|-----------|-------------------------|
| 89 | CMML | ASXL1                   | NM_015338.5:c.2077C>T                 | NP_056153.2:p.Arg693Ter            | 11,29 | snv       | stop_gained             |
| 89 | CMML | RUNX1                   | NM_001754.4:c.425C>T                  | NP_001745.2:p.Ala142Val            | 6,21  | snv       | missense_variant        |
| 89 | CMML | TET2                    | NM_001127208.2:c.2147dupC             | NP_001120680.1:p.His717ThrfsTer6   | 5,05  | insertion | frameshift_variant      |
| 90 | CMML | TET2                    | NM_001127208.2:c.4156C>G              | NP_001120680.1:p.His1386Asp        | 47,43 | snv       | missense_variant        |
| 90 | CMML | SRSF2                   | NM_003016.4:c.284C>A                  | NP_003007.2:p.Pro95His             | 39,48 | snv       | missense_variant        |
| 90 | CMML | NRAS                    | NM_002524.4:c.34G>C                   | NP_002515.1:p.Gly12Arg             | 19,14 | snv       | missense_variant        |
| 91 | CMML | TET2                    | NM_001127208.2:c.3283delA             | NP_001120680.1:p.Arg1095GlufsTer11 | 35,4  | deletion  | frameshift_variant      |
| 91 | CMML | TET2                    | NM_001127208.2:c.2155_2156delTT       | NP_001120680.1:p.Leu719AlafsTer3   | 28,68 | deletion  | frameshift_variant      |
| 91 | CMML | SF3B1                   | NM_012433.2:c.2098A>G                 | NP_036565.2:p.Lys700Glu            | 22,44 | snv       | missense_variant        |
| 91 | CMML | ZRSR2                   | NM_005089.3:c.976T>C                  | NP_005080.1:p.Cys326Arg            | 8,95  | snv       | missense_variant        |
| 91 | CMML | ZRSR2                   | NM_005089.3:c.772-1G>A                |                                    | 7,66  | snv       | splice_acceptor_variant |
| 91 | CMML | ZRSR2                   | NM_005089.3:c.868C>T                  | NP_005080.1:p.Arg290Ter            | 5,14  | snv       | stop_gained             |
| 91 | CMML | ZRSR2                   | NM_005089.3:c.1003_1013delCCCAACAATGA | NP_005080.1:p.Pro335IlefsTer5      | 2,5   | deletion  | frameshift_variant      |
| 92 | CMML | SRSF2                   | NM_003016.4:c.284C>A                  | NP_003007.2:p.Pro95His             | 46,79 | snv       | missense_variant        |
| 92 | CMML | IDH2                    | NM_002168.2:c.419G>T                  | NP_002159.2:p.Arg140Leu            | 45,18 | snv       | missense_variant        |
| 92 | CMML | KRAS                    | NM_033360.2:c.34G>C                   | NP_203524.1:p.Gly12Arg             | 43,31 | snv       | missense_variant        |
| 92 | CMML | ASXL1                   | NM_015338.5:c.2415dupC                | NP_056153.2:p.Thr806HisfsTer16     | 36,9  | insertion | frameshift_variant      |
| 93 | CMML | TET2                    | NM_001127208.2:c.5618T>C              | NP_001120680.1:p.Ile1873Thr        | 43,25 | snv       | missense_variant        |
| 93 | CMML | TET2                    | NM_001127208.2:c.2677delG             | NP_001120680.1:p.Ala893LeufsTer28  | 42,41 | deletion  | frameshift_variant      |
| 93 | CMML | SH2B3                   | NM_005475.2:c.933_940delGAGCACAG      | NP_005466.1:p.Thr313ArgfsTer11     | 20,09 | deletion  | frameshift_variant      |
| 93 | CMML | SH2B3                   | NM_005475.2:c.1204G>A                 | NP_005466.1:p.Val402Met            | 12,64 | snv       | missense_variant        |
| 93 | CMML | SH2B3                   | NM_005475.2:c.1038dupG                | NP_005466.1:p.Leu347AlafsTer38     | 6,68  | insertion | frameshift_variant      |
| 93 | CMML | SH2B3                   | NM_005475.2:c.20_21insAA              | NP_005466.1:p.Pro8SerfsTer29       | 5,43  | insertion | frameshift_variant      |
| 93 | CMML | TP53                    | NM_000546.5:c.476C>G                  | NP_000537.3:p.Ala159Gly            | 2,06  | snv       | missense_variant        |
| 94 | CMML | No mutations identified |                                       |                                    |       |           |                         |
